# Supplementary material for: Extending two-dimensional π-conjugation length by introducing the alkoxybiphenyl unit for efficient benzodithiophene based photovoltaic polymer
Source: Royal Society of Chemistry journal article supplement (doi:10.1039/c6tc03346f), 2016-01-01
Supplement: c6tc03346f1.pdf [file c6tc03346f1.pdf]

## Supplementary Information

### **Extending Two-Dimensional $\pi$ -Conjugation Length by Introducing the Alkoxybiphenyl unit for Efficient Benzodithiophene Based Photovoltaic Polymer**

Dakang Ding,<sup>a,b</sup> Weiye Chen,<sup>a†</sup> Jiuxing Wang,<sup>b</sup> Meng Qiu,<sup>b</sup> Huilin Zheng,<sup>a</sup> Junzhen Ren,<sup>a</sup> Meijie Fan,<sup>a</sup> Mingliang Sun,<sup>a,c</sup> and Renqiang Yang<sup>b</sup>

a Institute of Material Science and Engineering, Ocean University of China, Qingdao 266100, People's Republic of China.; E-mail: [mlsun@ouc.edu.cn](mailto:mlsun@ouc.edu.cn)

b CAS Key Laboratory of Bio-based Materials, Qingdao Institute of Bioenergy and Bioprocess Technology, Chinese Academy of Sciences, Qingdao 266101, People's Republic of China. E-mail: [yangrq@qibebt.ac.cn](mailto:yangrq@qibebt.ac.cn)

c State Key Laboratory of Luminescent Materials and Devices, South China University of Technology, Guangzhou 510640, China

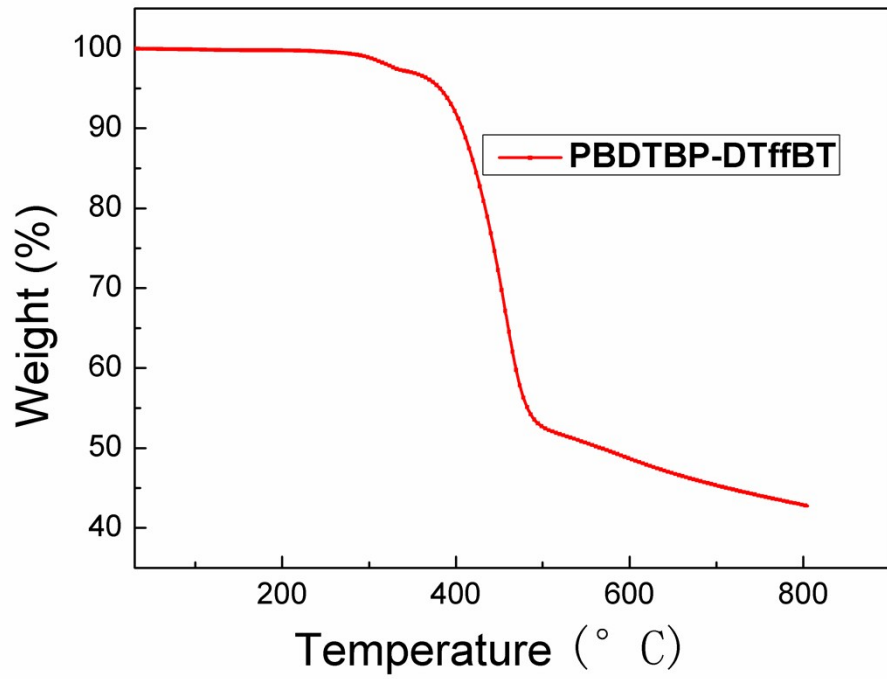

Fig.S1 TGA plot of PBDTBP-DTffBT

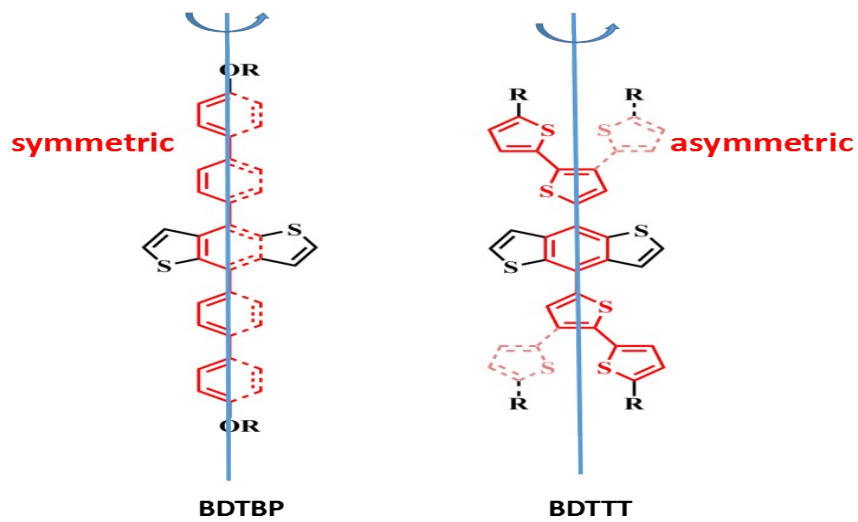

Fig.S2 .Two monomers based on BDT unit

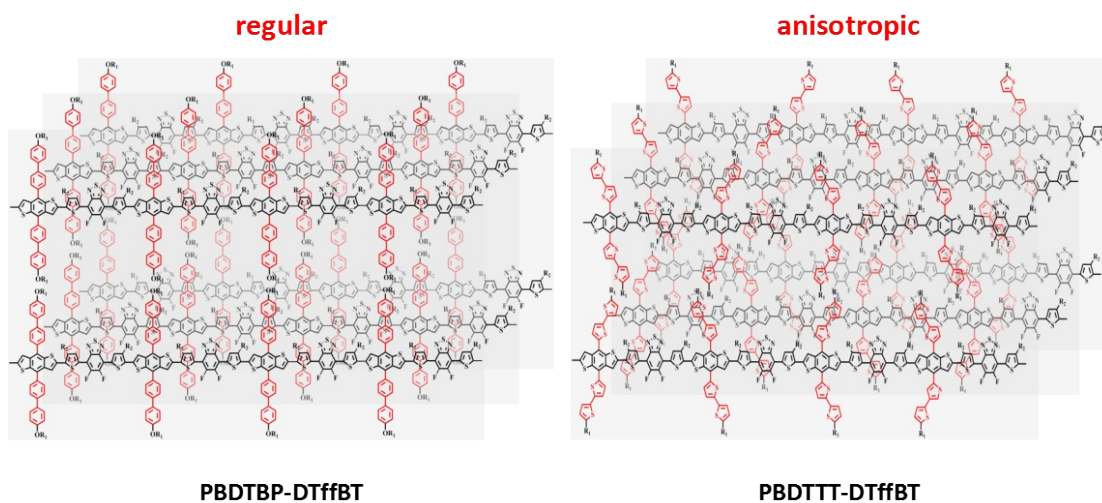

Fig. S3 .The Schematic illustration of spatial configuration for two polymers

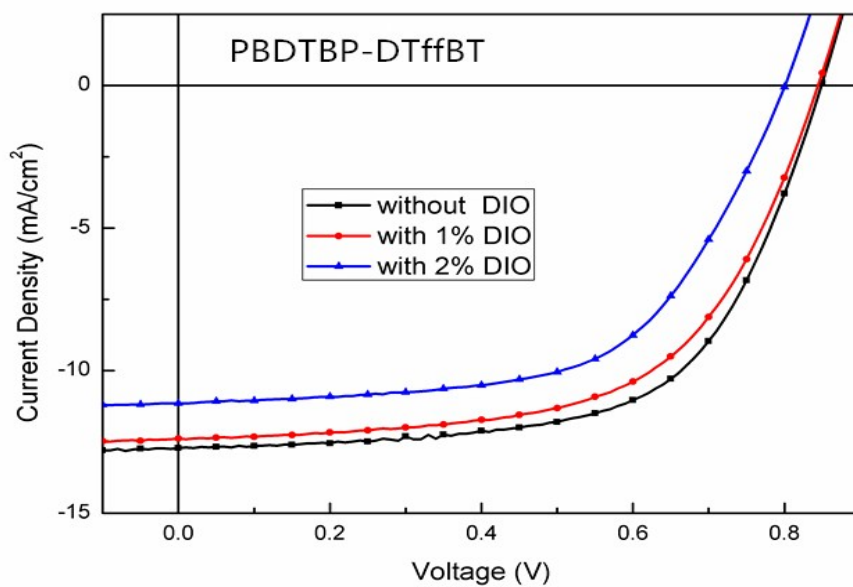

Fig. S4 .The J-V curves of PSCs with different weight ratios DIO
